# Supplementary material
Source: publisher figshare collection journal article supplement (https://frontiersin.figshare.com/ndownloader/files/14243420)
Supplement: Supplementary file [file 14243420]

Table S2. Downregulated genes in FtH<sup>LysM-/-</sup> compared to FtH<sup>fl/fl</sup> during sepsis

| GO ID | Biological processes                              | # Genes | P Value  |
|-------|---------------------------------------------------|---------|----------|
| 44130 | negative regulation of growth of symbiont in host | 5       | 7.45E-06 |
| 6955  | immune response                                   | 11      | 1.09E-05 |
| 7049  | cell cycle                                        | 15      | 4.29E-05 |
| 6882  | cellular zinc ion homeostasis                     | 4       | 2.01E-04 |
| 42127 | regulation of cell proliferation                  | 8       | 6.90E-04 |
| 51301 | cell division                                     | 10      | 7.30E-04 |
| 1878  | response to yeast                                 | 3       | 0.001133 |
| 6260  | DNA replication                                   | 6       | 0.001226 |
| 6954  | inflammatory response                             | 9       | 0.001788 |
| 7059  | chromosome segregation                            | 5       | 0.002663 |
| 9411  | response to UV                                    | 4       | 0.00348  |
| 8285  | negative regulation of cell proliferation         | 9       | 0.003516 |
| 50832 | defense response to fungus                        | 3       | 0.005298 |
| 60707 | trophoblast giant cell differentiation            | 3       | 0.005935 |
| 30889 | negative regulation of B cell proliferation       | 3       | 0.005935 |
| 42493 | response to drug                                  | 8       | 0.006543 |
| 82    | G1/S transition of mitotic cell cycle             | 4       | 0.007567 |
| 51412 | response to corticosterone                        | 3       | 0.008044 |
| 31668 | cellular response to extracellular stimulus       | 3       | 0.008812 |
| 32496 | response to lipopolysaccharide                    | 6       | 0.009148 |
| 10243 | response to organonitrogen compound               | 3       | 0.00961  |
| 30593 | neutrophil chemotaxis                             | 4       | 0.010147 |
| 6270  | DNA replication initiation                        | 3       | 0.01044  |
| 6829  | zinc II ion transport                             | 3       | 0.01219  |
| 1701  | in utero embryonic development                    | 7       | 0.013186 |
